# Supplementary material for: Prediction of organic homolytic bond dissociation enthalpies at near chemical accuracy with sub-second computational cost
Source: PubMed Central journal article supplement (PMC7214445; doi:10.1038/s41467-020-16201-z), 2020-05-11
Supplement: 41467_2020_16201_MOESM1_ESM.pdf [file 41467_2020_16201_MOESM1_ESM.pdf]

## Supporting Information

Prediction of organic homolytic bond dissociation enthalpies at near chemical accuracy with sub-second computational cost

St. John et al.

## Supplementary Figures

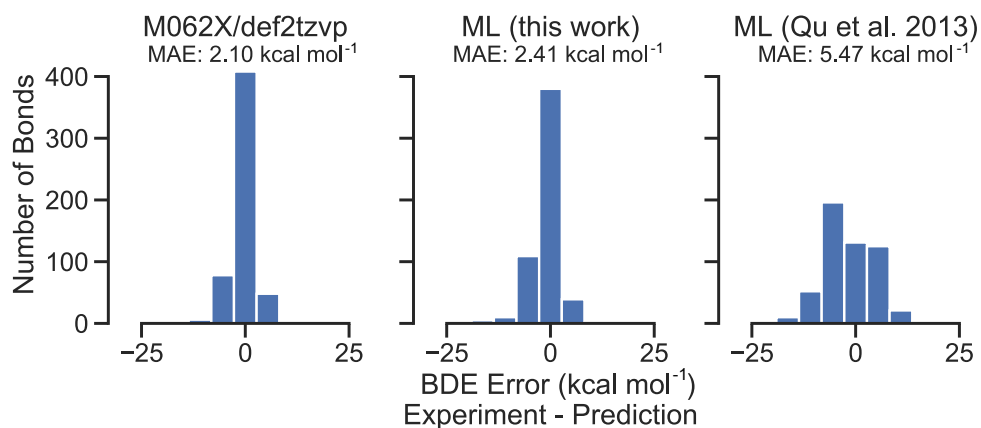

Supplementary Figure 1: Comparison against previous BDE prediction methods. DFT calculations and predictions from the ALFABET model are compared against those using the Neural Network model of Qu *et al.* 2013.<sup>28</sup>

## Supplementary Tables

Supplementary Table 1: Calculated Enthalpies for Error Analysis Calculations (Figure 4). All enthalpies are in Hartrees.

| Molecule                      | Radical               | $\Delta H_f$ (mol, DFT) | $\Delta H_f$ (mol, G4)                     | $\Delta H_f$ (rad, DFT) | $\Delta H_f$ (rad, G4)                           |
|-------------------------------|-----------------------|-------------------------|--------------------------------------------|-------------------------|--------------------------------------------------|
| <b>A</b> O=C1CCCC/C1=C/O      | [O]/C=C1/CCCCC1=O     | -423.02388              | 1a: -423.002035<br>1b: -422.983174         | -422.37628              | 2dot: -422.358274                                |
| <b>B</b> C/C=C(C)/C=C\C(=O)OC | C/C=C(C)/C=C\C([O])=O | -462.2693               | cis-3: -462.256891<br>trans-3: -462.264775 | -422.39872              | cis-4dot: -462.264775<br>trans-4dot: -422.328661 |
| <b>C</b> NC(=O)CCN(N)C(=O)O   | NC(=O)CCN(N)C([O])=O  | -547.63572              | 5: -547.576587                             | -546.99392              | 6dot: -546.958135<br>(includes CO <sub>2</sub> ) |
| <b>D</b> Nc1cc(N)cc(O)c1      | Nc1cc(N)cc([O])c1     | -418.03083              | 7: -417.999734                             | -417.36249              | 8dot: -417.363114                                |
